# Supplementary material for: Administration of hydro-alcoholic extract of spinach improves oxidative stress and inflammation in high-fat diet-induced NAFLD rats
Source: PubMed Central journal article supplement (PMC8418034; doi:10.1186/s12906-021-03396-x), 2021-09-03
Supplement: 12906_2021_3396_MOESM1_ESM.pdf [file 12906_2021_3396_MOESM1_ESM.pdf]

| name | group | TAC    | SOD    | GPX    | MMP9  | Hs_CRP | PTX3 | CCK    |
|------|-------|--------|--------|--------|-------|--------|------|--------|
| 1    | TC    | 220.00 | 22.11  | 286.54 | 0.608 | 4.50   | 0.77 | 55.40  |
| 2    | TC    | 182.00 | 54.94  | 260.04 | 0.488 | 2.78   | 0.57 | 78.18  |
| 3    | TC    | 180.00 | 68.75  | 217.07 | 0.382 | 3.13   | 0.59 | 108.36 |
| 4    | TC    | 212.00 | 92.04  | 232.54 | 0.620 | 3.71   | 0.74 | 118.61 |
| 5    | TC    | 216.00 | 32.39  | 208.39 | 0.408 | 3.73   | 0.74 | 187.50 |
| 6    | TC    | 219.00 | 66.30  | 198.70 | 0.542 | 3.04   | 0.40 | 157.34 |
| 7    | TF    | 179.00 | 38.21  | 164.97 | 0.836 | 4.12   | 0.95 | 127.16 |
| 8    | TF    | 181.00 | 35.35  | 208.39 | 0.657 | 4.51   | 0.71 | 139.69 |
| 9    | TF    | 190.00 | 72.04  | 180.24 | 0.511 | 4.98   | 0.79 | 89.00  |
| 10   | TF    | 190.00 | 31.03  | 303.90 | 1.120 | 3.35   | 0.83 | 114.06 |
| 11   | TF    | 182.00 | 46.45  | 260.20 | 0.991 | 5.02   | 0.98 | 141.96 |
| 12   | TF    | 195.00 | 43.71  | 229.95 | 0.794 | 6.20   | 0.92 | 153.35 |
| 13   | TCS   | 201.00 | 52.08  | 434.15 | 0.771 | 3.63   | 0.46 | 76.47  |
| 14   | TCS   | 193.00 | 47.82  | 164.97 | 0.756 | 3.58   | 0.60 | 122.60 |
| 15   | TCS   | 216.00 | 57.58  | 441.90 | 0.386 | 3.21   | 0.71 | 99.25  |
| 16   | TCS   | 206.00 | 53.96  | 416.78 | 0.277 | 4.44   | 0.69 | 105.51 |
| 17   | TCS   | 218.00 | 61.03  | 286.54 | 0.469 | 3.87   | 0.65 | 131.71 |
| 18   | TCS   | 202.00 | 87.50  | 451.51 | 0.505 | 3.39   | 0.68 | 163.04 |
| 19   | TFS   | 204.00 | 72.22  | 329.95 | 0.854 | 3.64   | 0.64 | 126.02 |
| 20   | TFS   | 206.00 | 69.47  | 309.52 | 0.454 | 3.62   | 0.59 | 103.24 |
| 21   | TFS   | 209.00 | 51.42  | 451.51 | 0.466 | 4.82   | 0.60 | 141.96 |
| 22   | TFS   | 215.00 | 69.41  | 370.22 | 0.841 | 2.91   | 0.94 | 154.49 |
| 23   | TFS   | 211.00 | 100.00 | 364.68 | 0.582 | 3.80   | 0.82 | 139.12 |
| 24   | TFS   | 209.00 | 62.26  | 191.02 | 0.696 | 3.30   | 0.45 | 138.55 |

| name | group | steatosis | inflammation | Balloning | total_food | weight | PPAR | IL10 | TNF  | stea_SCORE | NAS  |
|------|-------|-----------|--------------|-----------|------------|--------|------|------|------|------------|------|
| 1    | TC    | 0         | 1            | 0         | 76.10      | 0.00   | 1.62 | 0.41 | 0.49 | 0.00       | 1.00 |
| 2    | TC    | 1         | 0            | 0         | 86.70      | -14.00 | 0.83 | 0.64 | 0.93 | 1.00       | 1.00 |
| 3    | TC    | 0         | 2            | 0         | 78.20      | -58.00 | 0.93 | 3.72 | 1.28 | 0.00       | 2.00 |
| 4    | TC    | 0         | 0            | 0         | 71.10      | -37.00 | 0.92 | 2.38 | 1.53 | 0.00       | 0.00 |
| 5    | TC    | 0         | 0            | 0         | 78.70      | -20.00 | 1.18 | 1.38 | 0.83 | 0.00       | 0.00 |
| 6    | TC    | 0         | 1            | 1         | 75.90      | -3.00  | 0.71 | 0.30 | 0.35 | 0.00       | 2.00 |
| 7    | TF    | 2         | 2            | 1         | 103.20     | 16.00  | 1.32 | 0.61 | 1.50 | 2.00       | 5.00 |
| 8    | TF    | 1         | 1            | 1         | 120.10     | 22.00  | 1.20 | 0.90 | 2.12 | 1.00       | 3.00 |
| 9    | TF    | 2         | 1            | 2         | 111.90     | 10.00  | 0.91 | 1.59 | 2.32 | 2.00       | 5.00 |
| 10   | TF    | 2         | 2            | 0         | 86.85      | 20.00  | 1.51 | 1.02 | 1.43 | 2.00       | 4.00 |
| 11   | TF    | 1         | 2            | 0         | 109.90     | 6.00   | 1.36 | 0.77 | 1.49 | 1.00       | 3.00 |
| 12   | TF    | 2         | 2            | 2         | 137.20     | 27.00  | 1.39 | 0.84 | 2.62 | 2.00       | 6.00 |
| 13   | TCS   | 0         | 0            | 0         | 90.60      | -10.00 | 1.81 | 1.18 | 0.85 | 0.00       | 0.00 |
| 14   | TCS   | 0         | 1            | 1         | 77.45      | -20.00 | 1.56 | 0.96 | 0.66 | 0.00       | 2.00 |
| 15   | TCS   | 0         | 1            | 1         | 87.75      | 2.00   | 1.59 | 0.54 | 1.45 | 0.00       | 2.00 |
| 16   | TCS   | 0         | 1            | 1         | 80.45      | -27.00 | 1.41 | 1.09 | 1.01 | 0.00       | 2.00 |
| 17   | TCS   | 0         | 0            | 0         | 73.25      | -52.00 | 1.92 | 2.17 | 0.73 | 0.00       | 0.00 |
| 18   | TCS   | 0         | 0            | 0         | 83.35      | -30.00 | 1.53 | 1.88 | 0.91 | 0.00       | 0.00 |
| 19   | TFS   | 1         | 2            | 2         | 105.40     | 21.00  | 2.61 | 1.14 | 1.16 | 1.00       | 5.00 |
| 20   | TFS   | 0         | 0            | 0         | 108.60     | 12.00  | 2.53 | 0.77 | 1.41 | 0.00       | 0.00 |
| 21   | TFS   | 0         | 0            | 0         | 104.05     | -6.00  | 2.01 | 0.69 | 1.38 | 0.00       | 0.00 |
| 22   | TFS   | 1         | 1            | 0         | 90.85      | 16.00  | 1.85 | 0.81 | 0.89 | 1.00       | 2.00 |
| 23   | TFS   | 1         | 2            | 1         | 96.70      | 9.00   | 2.10 | 0.54 | 1.25 | 1.00       | 4.00 |
| 24   | TFS   | 1         | 1            | 0         | 111.00     | 22.00  | 2.81 | 2.74 | 0.99 | 1.00       | 2.00 |
