# Supplementary material for: Administration of hydro-alcoholic extract of spinach improves oxidative stress and inflammation in high-fat diet-induced NAFLD rats
Source: PubMed Central journal article supplement (PMC8418034; doi:10.1186/s12906-021-03396-x), 2021-09-03
Supplement: 12906_2021_3396_MOESM2_ESM.pdf [file 12906_2021_3396_MOESM2_ESM.pdf]

| name | group | weight | TAC    | SOD   | GPX    | MMP9  | Hs_CRP | PTX3 | CCK    |
|------|-------|--------|--------|-------|--------|-------|--------|------|--------|
| 1    | PC    | 117.00 | 237.00 | 58.82 | 193.24 | 0.584 | 3.23   | 0.63 | 214.86 |
| 2    | PC    | 84.00  | 213.00 | 42.46 | 223.12 | 0.581 | 3.66   | 0.78 | 104.94 |
| 3    | PC    | 66.00  | 269.00 | 44.13 | 164.97 | 0.576 | 2.97   | 0.78 | 131.71 |
| 4    | PC    | 91.00  | 226.00 | 51.47 | 317.32 | 0.832 | 3.24   | 0.59 | 97.54  |
| 5    | PC    | 92.00  | 234.00 | 34.44 | 262.59 | 0.817 | 2.02   | 0.62 | 178.41 |
| 6    | PC    | 114.00 | 188.00 | 92.85 | 209.14 | 0.511 | 3.12   | 0.58 | 146.52 |
| 7    | PF    | 103.00 | 236.00 | 62.50 | 186.83 | 0.809 | 3.68   | 0.90 | 169.30 |
| 8    | PF    | 137.00 | 224.00 | 20.80 | 197.21 | 0.663 | 5.41   | 0.72 | 100.39 |
| 9    | PF    | 176.00 | 196.00 | 27.00 | 243.12 | 0.634 | 3.56   | 0.86 | 215.43 |
| 10   | PF    | 130.00 | 212.00 | 40.17 | 182.10 | 0.839 | 3.97   | 0.73 | 141.96 |
| 11   | PF    | 165.00 | 241.00 | 36.60 | 234.44 | 0.916 | 3.65   | 0.95 | 219.99 |
| 12   | PF    | 146.00 | 213.00 | 39.80 | 281.27 | 0.603 | 4.43   | 0.89 | 137.98 |
| 13   | PFS   | 113.00 | 205.00 | 68.75 | 241.17 | 0.463 | 4.12   | 0.50 | 128.29 |
| 14   | PFS   | 129.00 | 195.00 | 50.37 | 254.40 | 0.551 | 2.59   | 0.80 | 117.47 |
| 15   | PFS   | 111.00 | 259.00 | 69.81 | 269.17 | 0.702 | 3.09   | 0.78 | 139.12 |
| 16   | PFS   | 90.00  | 218.00 | 78.94 | 243.12 | 0.817 | 3.11   | 0.72 | 131.14 |
| 17   | PFS   | 117.00 | 216.00 | 62.06 | 460.20 | 0.535 | 3.74   | 0.70 | 119.75 |
| 18   | PFS   | 137.00 | 207.00 | 65.85 | 260.04 | 0.674 | 2.87   | 0.62 | 107.22 |

| name | group | steatosis | Inflammation | balloning | total_food | PPAR | IL10 | TNF  | stea_score | NAS  |
|------|-------|-----------|--------------|-----------|------------|------|------|------|------------|------|
| 1    | PC    | 0         | 1            | 0         | 175.05     | 1.71 | 4.14 | 1.57 | 0.00       | 1.00 |
| 2    | PC    | 0         | 0            | 0         | 149.75     | 1.32 | 0.41 | 0.25 | 0.00       | 0.00 |
| 3    | PC    | 0         | 0            | 0         | 140.90     | 0.89 | 0.87 | 1.43 | 0.00       | 0.00 |
| 4    | PC    | 0         | 0            | 0         | 142.60     | 0.82 | 0.68 | 0.62 | 0.00       | 0.00 |
| 5    | PC    | 0         | 0            | 0         | 142.60     | 0.35 | 0.94 | 0.89 | 0.00       | 0.00 |
| 6    | PC    | 1         | 1            | 0         | 163.95     | 2.23 | 1.02 | 0.10 | 1.00       | 2.00 |
| 7    | PF    | 2         | 1            | 1         | 181.10     | 1.45 | 0.04 | 2.10 | 2.00       | 4.00 |
| 8    | PF    | 1         | 1            | 1         | 156.85     | 2.33 | 2.42 | 2.27 | 1.00       | 3.00 |
| 9    | PF    | 2         | 2            | 2         | 190.90     | 1.96 | 0.19 | 1.97 | 2.00       | 5.00 |
| 10   | PF    | 2         | 2            | 1         | 166.15     | 1.01 | 2.37 | 1.39 | 2.00       | 5.00 |
| 11   | PF    | 1         | 1            | 0         | 177.40     | 0.98 | 1.40 | 2.07 | 2.00       | 4.00 |
| 12   | PF    | 1         | 1            | 0         | 182.61     | 1.10 | 0.12 | 2.33 | 1.00       | 2.00 |
| 13   | PFS   | 1         | 1            | 1         | 153.10     | 2.51 | 1.25 | 2.33 | 1.00       | 3.00 |
| 14   | PFS   | 1         | 1            | 1         | 157.10     | 2.04 | 0.38 | 0.38 | 1.00       | 3.00 |
| 15   | PFS   | 1         | 0            | 0         | 174.60     | 7.68 | 0.74 | 0.91 | 1.00       | 1.00 |
| 16   | PFS   | 1         | 1            | 1         | 149.55     | 4.82 | 1.76 | 0.67 | 1.00       | 3.00 |
| 17   | PFS   | 0         | 1            | 0         | 158.15     | 3.68 | 1.43 | 0.01 | 0.00       | 1.00 |
| 18   | PFS   | 0         | 1            | 0         | 162.70     | 5.17 | 3.53 | 1.87 | 0.00       | 1.00 |
